# Supplementary material for: Low dose oestrogen combined oral contraception and risk of pulmonary embolism, stroke, and myocardial infarction in five million French women: cohort study
Source: PubMed Central journal article supplement — BMJ. 2016 May 10;353:i2002. doi: 10.1136/bmj.i2002 (PMC4862376; doi:10.1136/bmj.i2002), 2016-05-10
Supplement: weia023792.ww1_default.pdf [file weia023792.ww1_default.pdf]

## Web appendix: Supplementary material

Supplementary Table 1: Sample size and percentage of women of the COC cohort according to the end of follow-up criterion for each COC

Supplementary Table 2: Sample size and percentage of women of the COC cohort according to the end of follow-up criterion by generation of progestogen

Supplementary Table 3: Adjusted relative risks of pulmonary embolism, ischaemic stroke, myocardial infarction and composite event according to age, CMUc, medical risk factors and gynaecologist visit

Supplementary Table 4: Crude and standardized rates of pulmonary embolism, ischaemic stroke, myocardial infarction and composite event per 100,000 women-years according to type of COC

Supplementary Table 5: Effect of the inclusion of the various potential confounders on the association between pulmonary embolism and type of COC

Supplementary Table 6: Effect of the inclusion of the various potential confounders on the association between ischaemic stroke and type of COC

Supplementary Table 7: Effect of the inclusion of the various potential confounders on the association between myocardial infarction and type of COC

Supplementary Table 8 Effect of the inclusion of the various potential confounders on the association between the composite event and type of COC

Supplementary Table 9: Adjusted relative risks of pulmonary embolism, arterial event and composite event for postpartum women according to type of COC

Supplementary Table 10: Adjusted relative risks of pulmonary embolism stratified by medical follow-up by a gynaecologist and CMUc

Supplementary Table 11: Adjusted relative risks of pulmonary embolism, ischaemic stroke, myocardial infarction confirmed by two outpatient prescriptions following discharge from hospital according to type of COC

Supplementary Table 12: Adjusted relative risks of pulmonary embolism, ischaemic stroke, myocardial infarction according to the type of COC with censoring of exposure just after the end of the period covered by the last dispensing (M0)

Supplementary Table 13: Adjusted relative risks of pulmonary embolism, ischaemic stroke, myocardial infarction according to the type of COC with censoring of exposure one month after the end of the period covered by the last filled prescription (M+1)

Supplementary Table 14: Adjusted relative risks of pulmonary embolism, ischaemic stroke, myocardial infarction and composite event for non-switcher patients according to type of COC

Abbreviations used:

COC: combined oral contraceptives

CMUc: Complementary universal health insurance

EE: Ethinylestradiol

Supplementary Table 1: Sample size and percentage of women of the COC cohort according to the end of follow-up criterion for each COC

|                                   | Norethisterone 35 | Levonorgestrel 20 | Levonorgestrel 30/40 | Norgestrel 50 | Desogestrel 20 | Desogestrel 30 | Gestodene 20   | Gestodene 30  |
|-----------------------------------|-------------------|-------------------|----------------------|---------------|----------------|----------------|----------------|---------------|
| Discontinuation of COC dispensing | 32,766 (45.9)     | 263,206 (39.4)    | 1,247,358 (47.0)     | 31,757 (58.0) | 288,591 (47.4) | 265,469 (47.0) | 71,544 (36.0)  | 43,795 (34.4) |
| Pulmonary embolism                | 19 (0.0)          | 98 (0.0)          | 950 (0.0)            | 27 (0.0)      | 285 (0.0)      | 304 (0.1)      | 71 (0.0)       | 46 (0.0)      |
| Ischaemic stroke                  | 25 (0.0)          | 56 (0.0)          | 705 (0.0)            | 28 (0.1)      | 109 (0.0)      | 70 (0.0)       | 28 (0.0)       | 25 (0.0)      |
| Myocardial infarction             | 14 (0.0)          | 8 (0.0)           | 306 (0.0)            | 16 (0.0)      | 32 (0.0)       | 23 (0.0)       | 4 (0.0)        | 4 (0.0)       |
| Onset of pregnancy                | 4,680 (6.6)       | 42,930 (6.4)      | 232,143 (8.8)        | 4,718 (8.6)   | 39,812 (6.5)   | 37,005 (6.6)   | 11,538 (5.8)   | 6,600 (5.2)   |
| 50 years                          | 1,313 (1.8)       | 1,843 (0.3)       | 26,884 (1.0)         | 582 (1.1)     | 4,942 (0.8)    | 2,219 (0.4)    | 1,867 (0.9)    | 981 (0.8)     |
| Cancer                            | 742 (1.0)         | 3,353 (0.5)       | 18,043 (0.7)         | 709 (1.3)     | 4,203 (0.7)    | 3,264 (0.6)    | 1,145 (0.6)    | 741 (0.6)     |
| Surgery                           | 1,087 (1.5)       | 8,400 (1.3)       | 37,564 (1.4)         | 1,525 (2.8)   | 8,859 (1.5)    | 7,647 (1.4)    | 2,315 (1.2)    | 1,605 (1.3)   |
| Death                             | 21 (0.0)          | 66 (0.0)          | 755 (0.0)            | 23 (0.0)      | 77 (0.0)       | 102 (0.0)      | 21 (0.0)       | 8 (0.0)       |
| 30 September 2012                 | 30,666 (43.0)     | 347,838 (52.1)    | 1,087,326 (41.0)     | 15,326 (28.0) | 261,718 (43.0) | 248,493 (44.0) | 110,129 (55.4) | 73,521 (57.7) |

Supplementary Table 2: Sample size and percentage of women of the COC cohort according to the end of follow-up criterion by generation of progestogen

|                                   | 1st generation | 2nd generation   | 3rd generation | Total            |
|-----------------------------------|----------------|------------------|----------------|------------------|
| Discontinuation of COC dispensing | 32,766 (45.9)  | 1,542,321 (45.7) | 669,399 (44.7) | 2,244,486 (45.4) |
| Pulmonary embolism                | 19 (0.0)       | 1,075 (0.0)      | 706 (0.0)      | 1,800 (0.0)      |
| Ischaemic stroke                  | 25 (0.0)       | 789 (0.0)        | 232 (0.0)      | 1,046 (0.0)      |
| Myocardial infarction             | 14 (0.0)       | 330 (0.0)        | 63 (0.0)       | 407 (0.0)        |
| Onset of pregnancy                | 4,680 (6.6)    | 279,791 (8.3)    | 94,955 (6.3)   | 379,426 (7.7)    |
| 50 years                          | 1,313 (1.8)    | 29,309 (0.9)     | 10,009 (0.7)   | 40,631 (0.8)     |
| Cancer                            | 742 (1.0)      | 22,105 (0.7)     | 9,353 (0.6)    | 32,200 (0.7)     |
| Surgery                           | 1,087 (1.5)    | 47,489 (1.4)     | 20,426 (1.4)   | 69,002 (1.4)     |
| Death                             | 21 (0.0)       | 844 (0.0)        | 208 (0.0)      | 1,073 (0.0)      |
| 30 September 2012                 | 30,666 (43.0)  | 1,450,490 (43.0) | 693,861 (46.3) | 2,175,017 (44.0) |

First generation: norethisterone EE 35 µg

Second generation: levonorgestrel EE 30-40 µg, levonorgestrel EE 20 µg, norgestrel EE 50 µg

Third generation: desogestrel EE 30 µg, desogestrel EE 20 µg, gestodene EE 30 µg, gestodene EE 20 µg

Supplementary Table 3: Adjusted relative risks of pulmonary embolism, ischaemic stroke, myocardial infarction and composite event according to age, CMUc, medical risk factors and gynaecologist visit

|                        | Pulmonary Embolism |                  |                                 | Ischaemic Stroke |                                 | Myocardial Infarction |                                 | Composite event  |                                 |
|------------------------|--------------------|------------------|---------------------------------|------------------|---------------------------------|-----------------------|---------------------------------|------------------|---------------------------------|
|                        | Number of WY       | Number of events | Adjusted relative Risk (95% CI) | Number of events | Adjusted relative Risk (95% CI) | Number of events      | Adjusted relative Risk (95% CI) | Number of events | Adjusted relative Risk (95% CI) |
| Age                    |                    |                  |                                 |                  |                                 |                       |                                 |                  |                                 |
| 15-19 years            | 988,556            | 173              | 1                               | 34               | 1                               | 8                     | 1*                              | 212              | 1                               |
| 20-24 years            | 1,241,459          | 242              | 1.17 (0.97; 1.42)               | 83               | 1.96 (1.40; 2.80)               |                       |                                 | 328              | 1.27 (1.07; 1.52)               |
| 25-29 years            | 961,351            | 265              | 1.65 (1.37; 2.00)               | 95               | 2.90 (2.08; 4.11)               | 20                    | 5.65 (2.58;13.65)               | 380              | 1.89 (1.60; 2.25)               |
| 30-34 years            | 751,454            | 278              | 2.21 (1.84; 2.67)               | 147              | 5.73 (4.19; 8.01)               | 32                    | 11.55 (5.59;26.96)              | 457              | 2.91 (2.47; 3.44)               |
| 35-39 years            | 654,268            | 319              | 2.89 (2.42; 3.47)               | 200              | 8.81 (6.50;12.21)               | 90                    | 36.33 (18.77;81.47)             | 609              | 4.39 (3.76; 5.16)               |
| 40-44 years            | 464,121            | 294              | 3.71 (3.09; 4.46)               | 247              | 14.77 (10.95;20.40)             | 117                   | 62.32 (32.46;139.1)             | 658              | 6.51 (5.58; 7.63)               |
| 45-49 years            | 243,092            | 183              | 4.33 (3.53; 5.31)               | 187              | 20.66 (15.21;28.70)             | 110                   | 106.0 (54.99;237.0)             | 480              | 8.82 (7.50;10.41)               |
| CMUc†                  |                    |                  |                                 |                  |                                 |                       |                                 |                  |                                 |
| No                     | 4,757,405          | 1,512            | 1                               | 837              | 1                               | 281                   | 1                               | 2,63             | 1                               |
| Yes                    | 546,899            | 242              | 1.40 (1.22; 1.60)               | 156              | 1.48 (1.27; 1.71)               | 96                    | 2.48 (1.95; 3.13)               | 494              | 1.56 (1.41; 1.72)               |
| Antihypertensive drugs |                    |                  |                                 |                  |                                 |                       |                                 |                  |                                 |
| No                     | 5,219,466          | 1,683            | 1                               | 921              | 1                               | 335                   | 1                               | 2,939            | 1                               |
| Yes                    | 84,838             | 71               | 1.58 (1.29; 1.91)               | 72               | 1.88 (1.51; 2.30)               | 42                    | 1.96 (1.39; 2.71)               | 185              | 1.79 (1.57; 2.04)               |
| Antidiabetic drugs     |                    |                  |                                 |                  |                                 |                       |                                 |                  |                                 |
| No                     | 5,273,339          | 1,72             | 1                               | 964              | 1                               | 356                   | 1                               | 3,04             | 1                               |
| Yes                    | 30,965             | 34               | 2.17 (1.62; 2.82)               | 29               | 2.23 (1.60; 3.02)               | 21                    | 2.89 (1.78; 4.43)               | 84               | 2.38 (1.96; 2.85)               |
| Smoking status‡        |                    |                  |                                 |                  |                                 |                       |                                 |                  |                                 |
| No                     | 5,165,241          | 1,673            | 1                               | 946              | 1                               | 341                   | 1                               | 2,96             | 1                               |
| Yes                    | 139,062            | 81               | 1.60 (1.33; 1.91)               | 47               | 1.51 (1.17; 1.92)               | 36                    | 2.98 (2.07; 4.15)               | 164              | 1.75 (1.52; 1.99)               |
| Gynaecological visit   |                    |                  |                                 |                  |                                 |                       |                                 |                  |                                 |
| No                     | 3,080,647          | 1,076            | 1                               | 678              | 1                               | 291                   | 1                               | 2,045            | 1                               |
| Yes                    | 2,223,656          | 678              | 0.80 (0.73; 0.88)               | 315              | 0.70 (0.62; 0.78)               | 86                    | 0.56 (0.43; 0.71)               | 1,079            | 0.74 (0.68; 0.80)               |

Model adjusted for age, CMUc, medical risk factors, gynaecological visit during the previous year, type of progestogen and dose of EE

\* The reference category is 15-24 due to the small number of myocardial infarctions

† CMUc: free access to health care for people with an annual income <50% of the poverty threshold

‡ Hospital discharge diagnosis related to tobacco use or dispensing of nicotine replacement therapy

Supplementary Table 4: Crude and standardized rates of pulmonary embolism, ischaemic stroke, myocardial infarction and composite event per 100,000 women-years according to type of COC

|                             | Pulmonary embolism |                   | Ischaemic Stroke |                   | Myocardial infarction |                   | Composite event |                   |
|-----------------------------|--------------------|-------------------|------------------|-------------------|-----------------------|-------------------|-----------------|-------------------|
|                             | Crude rate         | Standardized rate | Crude rate       | Standardized rate | Crude rate            | Standardized rate | Crude rate      | Standardized rate |
| EE dose 20µg                | 31.9               | 25.5              | 13.6             | 14.0              | 3.1                   | 3.0               | 48.5            | 42.5              |
| EE dose 30-40µg             | 33.5               | 35.7              | 20.6             | 19.2              | 8.6                   | 7.6               | 62.7            | 62.5              |
| Levonorgestrel              | 27.9               | 25.8              | 20.3             | 18.5              | 8.4                   | 7.0               | 56.6            | 51.2              |
| Desogestrel                 | 46.9               | 56.0              | 14.2             | 15.3              | 4.4                   | 5.9               | 65.5            | 77.1              |
| Gestodene                   | 39.5               | 40.6              | 17.9             | 16.1              | 2.7                   | 6.1               | 60.1            | 62.8              |
| Type of COC                 |                    |                   |                  |                   |                       |                   |                 |                   |
| <i>Norethisterone 35</i>    | 20.5               | 12.3              | 27.0             | 17.3              | 15.1                  | 8.7               | 62.6            | 38.4              |
| <i>Levonorgestrel 20</i>    | 17.3               | 18.7              | 9.9              | 13.3              | 1.4                   | 2.4               | 28.6            | 34.4              |
| <i>Levonorgestrel 30/40</i> | 29.8               | 28.2              | 22.1             | 20.1              | 9.6                   | 8.3               | 61.6            | 56.6              |
| <i>Norgestrel 50</i>        | 57.5               | 46.7              | 59.6             | 37.0              | 34.1                  | 23.7              | 151.2           | 107.4             |
| <i>Desogestrel 20</i>       | 42.4               | 46.5              | 16.2             | 18.0              | 4.8                   | 6.2               | 63.3            | 70.7              |
| <i>Desogestrel 30</i>       | 52.1               | 60.2              | 12.0             | 15.1              | 3.9                   | 6.0               | 68.0            | 81.3              |
| <i>Gestodene 20</i>         | 38.3               | 37.6              | 15.1             | 13.9              | 2.2                   | 3.4               | 55.6            | 54.9              |
| <i>Gestodene 30</i>         | 41.4               | 41.3              | 22.5             | 17.4              | 3.6                   | 6.7               | 67.4            | 65.4              |

Direct standardization for age, CMUc (free access to health care for people with an annual income <50% of the poverty threshold), medical risk factors, gynaecological visit during the previous year, type of progestogen (for the dose of EE) and dose of EE (for the type of progestogen)

Supplementary Table 5: Effect of the inclusion of the various potential confounders on the association between pulmonary embolism and type of COC

|                             | Unadjusted model<br>Relative Risk<br>(95% CI) | M1 <sup>a</sup><br>Relative Risk<br>(95% CI) | M2 <sup>b</sup><br>Relative Risk<br>(95% CI) | M3 <sup>c</sup><br>Relative Risk<br>(95% CI) | M4 <sup>d</sup><br>Relative Risk<br>(95% CI) | M5 <sup>e</sup><br>Relative Risk (95%<br>CI) |
|-----------------------------|-----------------------------------------------|----------------------------------------------|----------------------------------------------|----------------------------------------------|----------------------------------------------|----------------------------------------------|
| EE dose 20µg                | 0.95 (0.76; 1.18)                             | 0.99 (0.84; 1.16)                            | 1.00 (0.86; 1.16)                            | 1.02 (0.89; 1.17)                            | 1.05 (0.91; 1.20)                            | 0.75 (0.67; 0.85)                            |
| EE dose 30-40µg             | 1                                             | 1                                            | 1                                            | 1                                            | 1                                            | 1                                            |
| Levonorgestrel              | 1                                             | 1                                            | 1                                            | 1                                            | 1                                            | 1                                            |
| Desogestrel                 | 1.68 (1.38; 2.03)                             | 1.77 (1.55; 2.01)                            | 1.79 (1.60; 2.01)                            | 1.84 (1.66; 2.03)                            | 1.93 (1.74; 2.13)                            | 2.16 (1.93; 2.41)                            |
| Gestodene                   | 1.41 (0.97; 1.99)                             | 1.28 (0.99; 1.62)                            | 1.32 (1.06; 1.63)                            | 1.38 (1.13; 1.66)                            | 1.43 (1.18; 1.72)                            | 1.63 (1.34; 1.97)                            |
| <b>Type of COC</b>          |                                               |                                              |                                              |                                              |                                              |                                              |
| <i>Norethisterone 35</i>    | 0.69 (0.28; 1.38)                             | 0.56 (0.30; 0.93)                            | 0.56 (0.33; 0.87)                            | 0.56 (0.35; 0.84)                            | 0.56 (0.35; 0.83)                            |                                              |
| <i>Levonorgestrel 20</i>    | 0.58 (0.40; 0.82)                             | 0.68 (0.52; 0.88)                            | 0.69 (0.55; 0.86)                            | 0.70 (0.57; 0.85)                            | 0.73 (0.60; 0.89)                            |                                              |
| <i>Levonorgestrel 30/40</i> | 1                                             | 1                                            | 1                                            | 1                                            | 1                                            |                                              |
| <i>Norgestrel 50</i>        | 1.93 (0.92; 3.51)                             | 1.71 (1.02; 2.65)                            | 1.67 (1.09; 2.44)                            | 1.64 (1.12; 2.31)                            | 1.66 (1.14; 2.34)                            |                                              |
| <i>Desogestrel 20</i>       | 1.42 (1.12; 1.78)                             | 1.43 (1.21; 1.69)                            | 1.46 (1.27; 1.68)                            | 1.51 (1.33; 1.71)                            | 1.60 (1.41; 1.82)                            |                                              |
| <i>Desogestrel 30</i>       | 1.75 (1.39; 2.17)                             | 2.04 (1.73; 2.39)                            | 2.07 (1.80; 2.37)                            | 2.10 (1.85; 2.37)                            | 2.18 (1.93; 2.47)                            |                                              |
| <i>Gestodene 20</i>         | 1.29 (0.83; 1.90)                             | 1.20 (0.88; 1.59)                            | 1.24 (0.95; 1.59)                            | 1.29 (1.02; 1.61)                            | 1.34 (1.06; 1.67)                            |                                              |
| <i>Gestodene 30</i>         | 1.39 (0.80; 2.23)                             | 1.26 (0.85; 1.78)                            | 1.31 (0.94; 1.76)                            | 1.36 (1.01; 1.78)                            | 1.43 (1.07; 1.87)                            |                                              |

<sup>a</sup> M1: Model adjusted for age

<sup>b</sup> M2: Model adjusted for age and medical risk factors

<sup>c</sup> M3: Model adjusted for age, medical risk factors, and CMUc

<sup>d</sup> M4: Model adjusted for age, medical risk factors, CMUc and gynaecological visit during the previous year

<sup>e</sup> M5: Model adjusted for age, CMUc, medical risk factors, gynaecological visit during the previous year, type of progestogen (for the dose of EE), dose of EE (for the type of progestogen)

Supplementary Table 6: Effect of the inclusion of the various potential confounders on the association between ischaemic stroke and type of COC

|                             | Unadjusted model<br>Relative Risk<br>(95% CI) | M1 <sup>a</sup><br>Relative Risk<br>(95% CI) | M2 <sup>b</sup><br>Relative Risk<br>(95% CI) | M3 <sup>c</sup><br>Relative Risk<br>(95% CI) | M4 <sup>d</sup><br>Relative Risk<br>(95% CI) | M5 <sup>e</sup><br>Relative Risk<br>(95% CI) |
|-----------------------------|-----------------------------------------------|----------------------------------------------|----------------------------------------------|----------------------------------------------|----------------------------------------------|----------------------------------------------|
| EE dose 20µg                | 0.66 (0.45; 0.94)                             | 0.70 (0.58; 0.84)                            | 0.72 (0.61; 0.84)                            | 0.74 (0.64; 0.85)                            | 0.80 (0.70; 0.92)                            | 0.82 (0.70; 0.96)                            |
| EE dose 30-40µg             | 1                                             | 1                                            | 1                                            | 1                                            | 1                                            | 1                                            |
| Levonorgestrel              | 1                                             | 1                                            | 1                                            | 1                                            | 1                                            | 1                                            |
| Desogestrel                 | 0.70 (0.47; 1.01)                             | 0.77 (0.64; 0.93)                            | 0.79 (0.67; 0.93)                            | 0.81 (0.70; 0.94)                            | 0.88 (0.76; 1.01)                            | 0.96 (0.82; 1.12)                            |
| Gestodene                   | 0.88 (0.43; 1.60)                             | 0.74 (0.53; 1.01)                            | 0.78 (0.58; 1.02)                            | 0.82 (0.63; 1.04)                            | 0.87 (0.68; 1.10)                            | 0.96 (0.74; 1.23)                            |
| <b>Type of COC</b>          |                                               |                                              |                                              |                                              |                                              |                                              |
| <i>Norethisterone 35</i>    | 1.22 (0.44; 2.64)                             | 0.84 (0.51; 1.31)                            | 0.84 (0.55; 1.23)                            | 0.85 (0.58; 1.19)                            | 0.85 (0.58; 1.19)                            | -                                            |
| <i>Levonorgestrel 20</i>    | 0.45 (0.23; 0.78)                             | 0.60 (0.43; 0.82)                            | 0.62 (0.46; 0.80)                            | 0.63 (0.48; 0.79)                            | 0.68 (0.53; 0.86)                            | -                                            |
| <i>Levonorgestrel 30/40</i> | 1                                             | 1                                            | 1                                            | 1                                            | 1                                            | -                                            |
| <i>Norgestrel 50</i>        | 2.69 (1.04; 5.62)                             | 2.19 (1.36; 3.33)                            | 2.14 (1.43; 3.06)                            | 2.10 (1.46; 2.90)                            | 2.13 (1.50; 2.94)                            | -                                            |
| <i>Desogestrel 20</i>       | 0.73 (0.46; 1.11)                             | 0.75 (0.58; 0.94)                            | 0.77 (0.62; 0.94)                            | 0.80 (0.66; 0.96)                            | 0.88 (0.73; 1.06)                            | -                                            |
| <i>Desogestrel 30</i>       | 0.54 (0.30; 0.90)                             | 0.72 (0.53; 0.95)                            | 0.73 (0.57; 0.93)                            | 0.75 (0.60; 0.93)                            | 0.80 (0.64; 0.99)                            | -                                            |
| <i>Gestodene 20</i>         | 0.68 (0.26; 1.43)                             | 0.61 (0.38; 0.93)                            | 0.64 (0.43; 0.92)                            | 0.68 (0.47; 0.93)                            | 0.72 (0.50; 0.99)                            | -                                            |
| <i>Gestodene 30</i>         | 1.02 (0.37; 2.20)                             | 0.87 (0.52; 1.35)                            | 0.92 (0.60; 1.34)                            | 0.96 (0.66; 1.35)                            | 1.04 (0.71; 1.46)                            | -                                            |

<sup>a</sup> M1: Model adjusted for age

<sup>b</sup> M2: Model adjusted for age and medical risk factors

<sup>c</sup> M3: Model adjusted for age, medical risk factors, and CMUc

<sup>d</sup> M4: Model adjusted for age, medical risk factors, CMUc and gynaecological visit during the previous year

<sup>e</sup> M5: Model adjusted for age, CMUc, medical risk factors, gynaecological visit during the previous year, type of progestogen (for the dose of EE), dose of EE (for the type of progestogen)



Supplementary Table 7: Effect of the inclusion of the various potential confounders on the association between myocardial infarction and type of COC

|                             | Unadjusted model<br>Relative Risk<br>(95% CI) | M1 <sup>a</sup><br>Relative Risk<br>(95% CI) | M2 <sup>b</sup><br>Relative Risk<br>(95% CI) | M3 <sup>c</sup><br>Relative Risk<br>(95% CI) | M4 <sup>d</sup><br>Relative Risk<br>(95% CI) | M5 <sup>e</sup><br>Relative Risk<br>(95% CI) |
|-----------------------------|-----------------------------------------------|----------------------------------------------|----------------------------------------------|----------------------------------------------|----------------------------------------------|----------------------------------------------|
| EE dose 20µg                | 0.36 (0.26; 0.49)                             | 0.39 (0.28; 0.53)                            | 0.42 (0.30; 0.57)                            | 0.46 (0.33; 0.63)                            | 0.53 (0.38; 0.72)                            | 0.56 (0.39; 0.79)                            |
| EE dose 30-40µg             | 1                                             | 1                                            | 1                                            | 1                                            | 1                                            | 1                                            |
| Levonorgestrel              | 1                                             | 1                                            | 1                                            | 1                                            | 1                                            | 1                                            |
| Desogestrel                 | 0.52 (0.39; 0.69)                             | 0.59 (0.44; 0.78)                            | 0.63 (0.47; 0.83)                            | 0.69 (0.51; 0.91)                            | 0.79 (0.58; 1.04)                            | 1.01 (0.73; 1.39)                            |
| Gestodene                   | 0.32 (0.15; 0.61)                             | 0.26 (0.12; 0.49)                            | 0.29 (0.13; 0.55)                            | 0.34 (0.15; 0.63)                            | 0.37 (0.17; 0.71)                            | 0.49 (0.22; 0.94)                            |
| <b>Type of COC</b>          |                                               |                                              |                                              |                                              |                                              |                                              |
| <i>Norethisterone 35</i>    | 1.57 (0.88; 2.58)                             | 0.95 (0.53; 1.57)                            | 0.95 (0.53; 1.57)                            | 0.98 (0.54; 1.60)                            | 0.97 (0.54; 1.60)                            | -                                            |
| <i>Levonorgestrel 20</i>    | 0.15 (0.07; 0.28)                             | 0.22 (0.10; 0.42)                            | 0.24 (0.11; 0.44)                            | 0.25 (0.11; 0.46)                            | 0.28 (0.13; 0.53)                            | -                                            |
| <i>Levonorgestrel 30/40</i> | 1                                             | 1                                            | 1                                            | 1                                            | 1                                            | -                                            |
| <i>Norgestrel 50</i>        | 3.55 (2.06; 5.66)                             | 2.69 (1.56; 4.30)                            | 2.56 (1.49; 4.10)                            | 2.44 (1.42; 3.90)                            | 2.50 (1.45; 3.99)                            | -                                            |
| <i>Desogestrel 20</i>       | 0.50 (0.34; 0.70)                             | 0.51 (0.35; 0.72)                            | 0.54 (0.37; 0.77)                            | 0.60 (0.41; 0.86)                            | 0.71 (0.48; 1.02)                            | -                                            |
| <i>Desogestrel 30</i>       | 0.41 (0.26; 0.61)                             | 0.61 (0.39; 0.90)                            | 0.63 (0.40; 0.94)                            | 0.67 (0.43; 1.00)                            | 0.75 (0.48; 1.12)                            | -                                            |
| <i>Gestodene 20</i>         | 0.22 (0.07; 0.53)                             | 0.19 (0.06; 0.46)                            | 0.22 (0.07; 0.52)                            | 0.25 (0.08; 0.59)                            | 0.28 (0.09; 0.66)                            | -                                            |
| <i>Gestodene 30</i>         | 0.37 (0.12; 0.88)                             | 0.31 (0.09; 0.72)                            | 0.35 (0.11; 0.81)                            | 0.39 (0.12; 0.92)                            | 0.45 (0.14; 1.05)                            | -                                            |

<sup>a</sup> M1: Model adjusted for age

<sup>b</sup> M2: Model adjusted for age and medical risk factors

<sup>c</sup> M3: Model adjusted for age, medical risk factors, and CMUc

<sup>d</sup> M4: Model adjusted for age, medical risk factors, CMUc and gynaecological visit during the previous year

<sup>e</sup> M5: Model adjusted for age, CMUc, medical risk factors, gynaecological visit during the previous year, type of progestogen (for the dose of EE), dose of EE (for the type of progestogen).

Supplementary Table 8 Effect of the inclusion of the various potential confounders on the association between the composite event and type of COC

|                             | Unadjusted model<br>Relative Risk<br>(95% CI) | M1 <sup>a</sup><br>Relative Risk<br>(95% CI) | M2 <sup>b</sup><br>Relative Risk<br>(95% CI) | M3 <sup>c</sup><br>Relative Risk<br>(95% CI) | M4 <sup>d</sup><br>Relative Risk<br>(95% CI) | M5 <sup>e</sup><br>Relative Risk<br>(95% CI) |
|-----------------------------|-----------------------------------------------|----------------------------------------------|----------------------------------------------|----------------------------------------------|----------------------------------------------|----------------------------------------------|
| EE dose 20µg                | 0.77 (0.59; 1.00)                             | 0.81 (0.71; 0.94)                            | 0.84 (0.74; 0.94)                            | 0.86 (0.78; 0.95)                            | 0.91 (0.82; 1.00)                            | 0.74 (0.67; 0.82)                            |
| EE dose 30-40µg             | 1                                             | 1                                            | 1                                            | 1                                            | 1                                            | 1                                            |
| Levonorgestrel              | 1                                             | 1                                            | 1                                            | 1                                            | 1                                            | 1                                            |
| Desogestrel                 | 1.16 (0.89; 1.49)                             | 1.25 (1.09; 1.42)                            | 1.27 (1.14; 1.42)                            | 1.32 (1.20; 1.44)                            | 1.41 (1.29; 1.53)                            | 1.59 (1.45; 1.74)                            |
| Gestodene                   | 1.06 (0.63; 1.68)                             | 0.92 (0.71; 1.18)                            | 0.97 (0.79; 1.19)                            | 1.03 (0.86; 1.22)                            | 1.08 (0.92; 1.27)                            | 1.24 (1.06; 1.46)                            |
| <b>Type of COC</b>          |                                               |                                              |                                              |                                              |                                              |                                              |
| <i>Norethisterone 35</i>    | 1.02 (0.44; 1.98)                             | 0.75 (0.49; 1.08)                            | 0.75 (0.54; 1.01)                            | 0.75 (0.57; 0.98)                            | 0.75 (0.58; 0.96)                            | -                                            |
| <i>Levonorgestrel 20</i>    | 0.47 (0.29; 0.71)                             | 0.58 (0.46; 0.74)                            | 0.60 (0.49; 0.73)                            | 0.61 (0.51; 0.72)                            | 0.65 (0.55; 0.76)                            | -                                            |
| <i>Levonorgestrel 30/40</i> | 1                                             | 1                                            | 1                                            | 1                                            | 1                                            | -                                            |
| <i>Norgestrel 50</i>        | 2.46 (1.16; 4.52)                             | 2.07 (1.42; 2.91)                            | 2.02 (1.49; 2.66)                            | 1.97 (1.52; 2.50)                            | 2.00 (1.57; 2.51)                            | -                                            |
| <i>Desogestrel 20</i>       | 1.03 (0.76; 1.37)                             | 1.04 (0.89; 1.22)                            | 1.07 (0.94; 1.22)                            | 1.12 (1.00; 1.25)                            | 1.22 (1.10; 1.35)                            | -                                            |
| <i>Desogestrel 30</i>       | 1.10 (0.80; 1.49)                             | 1.38 (1.17; 1.62)                            | 1.40 (1.23; 1.60)                            | 1.43 (1.28; 1.60)                            | 1.52 (1.36; 1.69)                            | -                                            |
| <i>Gestodene 20</i>         | 0.90 (0.49; 1.52)                             | 0.82 (0.60; 1.09)                            | 0.87 (0.67; 1.10)                            | 0.92 (0.74; 1.12)                            | 0.97 (0.79; 1.17)                            | -                                            |
| <i>Gestodene 30</i>         | 1.10 (0.53; 1.99)                             | 0.96 (0.67; 1.34)                            | 1.02 (0.76; 1.33)                            | 1.07 (0.83; 1.35)                            | 1.15 (0.91; 1.43)                            | -                                            |

<sup>a</sup> M1: Model adjusted for age

<sup>b</sup> M2: Model adjusted for age and medical risk factors

<sup>c</sup> M3: Model adjusted for age, medical risk factors, and CMUc

<sup>d</sup> M4: Model adjusted for age, medical risk factors, CMUc and gynaecological visit during the previous year

<sup>e</sup> M5: Model adjusted for age, CMUc, medical risk factors, gynaecological visit during the previous year, type of progestogen (for the dose of EE), dose of EE (for the type of progestogen)

Supplementary Table 9: Adjusted relative risks of pulmonary embolism, arterial event and composite event for postpartum women according to type of COC

|                 | Number of WY | Pulmonary embolism |                                 | Arterial events (ischaemic stroke and/or myocardial infarction) |                                 | Composite event  |                                 |
|-----------------|--------------|--------------------|---------------------------------|-----------------------------------------------------------------|---------------------------------|------------------|---------------------------------|
|                 |              | Number of events   | Adjusted relative Risk (95% CI) | Number of events                                                | Adjusted relative Risk (95% CI) | Number of events | Adjusted relative Risk (95% CI) |
| EE dose 20µg    | 133,017      | 38                 | 0.65 (0.44; 0.94)               | 12                                                              | 0.36 (0.20; 0.62)               | 50               | 0.54 (0.39; 0.75)               |
| EE dose 30-40µg | 335,633      | 119                | 1                               | 76                                                              | 1                               | 195              | 1                               |
| Levonorgestrel  | 343,223      | 97                 | 1                               | 64                                                              | 1                               | 161              | 1                               |
| Desogestrel     | 104,278      | 53                 | 2.16 (1.52; 3.03)               | 19                                                              | 1.40 (0.86; 2.20)               | 72               | 1.87 (1.39; 2.50)               |
| Gestodene       | 21,149       | 7                  | 1.49 (0.64; 2.99)               | 5                                                               | 1.99 (0.79; 4.20)               | 12               | 1.65 (0.86; 2.89)               |

Model adjusted for age, CMUc (free access to health care for people with an annual income <50% of the poverty threshold), medical risk factors, gynaecological visit during the previous year, type of progestogen (for the dose of EE), dose of EE (for the type of progestogen)

Supplementary Table 10: Adjusted relative risks of pulmonary embolism stratified by medical follow-up by a gynaecologist and CMUc

|                                      | Levonorgestrel    |       | Desogestrel/Gestodene |                   |
|--------------------------------------|-------------------|-------|-----------------------|-------------------|
|                                      | 20 µg             | 30 µg | 20 µg                 | 30 µg             |
| consultation with a gynaecologist*   | 0.75 (0.56; 0.98) | 1     | 1.55 (1.31; 1.83)     | 2.06 (1.76; 2.42) |
| No consultation with a gynaecologist | 0.71 (0.51; 0.97) | 1     | 1.53 (1.27; 1.85)     | 2.00 (1.63; 2.44) |
| Without CMUc †                       | 0.70 (0.55; 0.87) | 1     | 1.48 (1.30; 1.68)     | 2.03 (1.78; 2.31) |
| With CMUc                            | 0.92 (0.55; 1.45) | 1     | 2.30 (1.59; 3.25)     | 2.01 (1.42; 2.79) |

Model adjusted for age, CMUc (for consultation with a gynaecologist), medical risk factors, consultation with a gynaecological (for CMUc)

\*during the previous year

† CMUc: free access to health care for people with an annual income <50% of the poverty threshold

Supplementary Table 11 : Adjusted relative risks of pulmonary embolism, ischaemic stroke, myocardial infarction confirmed by two outpatient prescriptions following discharge from hospital\* according to type of COC

|                      | Number of WY | Pulmonary embolism |                                 | Ischaemic Stroke |                                 | Myocardial infarction |                                 |
|----------------------|--------------|--------------------|---------------------------------|------------------|---------------------------------|-----------------------|---------------------------------|
|                      |              | Number of events   | Adjusted relative Risk (95% CI) | Number of events | Adjusted relative Risk (95% CI) | Number of events      | Adjusted relative Risk (95% CI) |
| EE dose 20µg         | 1,423,797    | 402                | 0.75 ( 0.67; 0.84)              | 134              | 0.75 ( 0.61; 0.91)              | 42                    | 0.54 ( 0.34; 0.84)              |
| EE dose 30-40µg      | 3,880,507    | 1139               | 1                               | 621              | 1                               | 314                   | 1                               |
| Levonorgestrel       | 3,751,457    | 912                | 1                               | 591              | 1                               | 295                   | 1                               |
| Desogestrel          | 1,256,568    | 530                | 2.22 ( 1.99; 2.48)              | 122              | 0.87 ( 0.71; 1.07)              | 53                    | 1.02 ( 0.67; 1.51)              |
| Gestodene            | 296,425      | 99                 | 1.57 ( 1.28; 1.91)              | 42               | 0.98 ( 0.71; 1.32)              | 8                     | 0.47 ( 0.17; 1.05)              |
| <b>Type of COC</b>   |              |                    |                                 |                  |                                 |                       |                                 |
| Norethisterone 35    | 92,646       | 19                 | 0.64 ( 0.41; 0.94)              | 20               | 0.86 ( 0.57; 1.24)              | 13                    | 0.96 ( 0.52; 1.60)              |
| Levonorgestrel 20    | 565,772      | 85                 | 0.73 ( 0.59; 0.89)              | 41               | 0.65 ( 0.49; 0.85)              | 8                     | 0.30 ( 0.14; 0.57)              |
| Levonorgestrel 30/40 | 3,185,684    | 827                | 1                               | 550              | 1                               | 287                   | 1                               |
| Norgestrel 50        | 46,970       | 23                 | 1.64 ( 1.10; 2.33)              | 20               | 1.95 ( 1.29; 2.80)              | 15                    | 2.49 ( 1.42; 4.03)              |
| Desogestrel 20       | 672,846      | 257                | 1.64 ( 1.44; 1.87)              | 69               | 0.72 ( 0.58; 0.90)              | 30                    | 0.71 ( 0.47; 1.02)              |
| Desogestrel 30       | 583,721      | 273                | 2.24 ( 1.97; 2.54)              | 53               | 0.79 ( 0.61; 1.00)              | 23                    | 0.80 ( 0.51; 1.20)              |
| Gestodene 20         | 185,213      | 60                 | 1.29 ( 1.01; 1.62)              | 24               | 0.79 ( 0.55; 1.11)              | 4                     | 0.30 ( 0.09; 0.70)              |
| Gestodene 30         | 111,212      | 39                 | 1.37 ( 1.01; 1.82)              | 18               | 0.96 ( 0.62; 1.41)              | 4                     | 0.47 ( 0.15; 1.11)              |

Model adjusted for age, CMUc (free access to health care for people with an annual income <50% of the poverty threshold), medical risk factors, gynaecological visit during the previous year, type of progestogen (for the dose of EE), dose of EE (for the type of progestogen)

\* Confirmation that women had not died 30 days after the event of interest by at least two drug prescriptions during the following 4 months - corresponding to oral anticoagulants after hospitalisation for pulmonary embolism, - antiplatelet agents after stroke –at least two drug classes from among antiplatelet agents, beta-blocking agents, statins, angiotensin-converting enzyme inhibitors or angiotensin-receptor blockers (AEC-I/ARB) after myocardial infarction.

Supplementary Table 12 Adjusted relative risks of pulmonary embolism, ischaemic stroke, myocardial infarction according to the type of COC with censoring of exposure just after the end of the period covered by the last dispensing (M0)

|                      | Number of WY | Pulmonary embolism |                                 | Ischaemic Stroke |                                 | Myocardial infarction                            |                                 |
|----------------------|--------------|--------------------|---------------------------------|------------------|---------------------------------|--------------------------------------------------|---------------------------------|
|                      |              | Number of events   | Adjusted relative Risk (95% CI) | Number of events | Adjusted relative Risk (95% CI) | Number of events                                 | Adjusted relative Risk (95% CI) |
| EE dose 20µg         | 666,964      | 230                | 0.76 (0.65; 0.89)               | 93               | 0.87 (0.68; 1.09)               | 18                                               | 0.58 (0.32; 0.99)               |
| EE dose 30-40µg      | 1,680,484    | 613                | 1                               | 347              | 1                               | 127                                              | 1                               |
| Levonorgestrel       | 1,628,760    | 491                | 1                               | 333              | 1                               | 118                                              | 1                               |
| Desogestrel          | 567,694      | 284                | 2.10 (1.80; 2.44)               | 80               | 0.90 (0.70; 1.15)               | 24                                               | 1.19 (0.71; 1.92)               |
| Gestodene            | 150,994      | 68                 | 1.69 (1.31; 2.15)               | 27               | 0.91 (0.62; 1.30)               | 3                                                | 0.45 (0.11; 1.25)               |
| <b>Type of COC</b>   |              |                    |                                 |                  |                                 | <b>Ischaemic Stroke or Myocardial infarction</b> |                                 |
| Norethisterone 35    | 38,575       | 6                  | 0.40 (0.18; 0.77)               |                  |                                 | 10                                               | 0.57 (0.27; 1.04)               |
| Levonorgestrel 20    | 267,349      | 57                 | 0.84 (0.65; 1.07)               |                  |                                 | 35                                               | 0.71 (0.48; 1.00)               |
| Levonorgestrel 30/40 | 1,361,410    | 434                | 1                               |                  |                                 | 416                                              | 1                               |
| Norgestrel 50        | 19,616       | 16                 | 2.22 (1.38; 3.36)               |                  |                                 | 25                                               | 3.09 (1.97; 4.60)               |
| Desogestrel 20       | 304,846      | 131                | 1.52 (1.27; 1.81)               |                  |                                 | 62                                               | 0.86 (0.64; 1.13)               |
| Desogestrel 30       | 262,847      | 153                | 2.26 (1.91; 2.66)               |                  |                                 | 42                                               | 0.81 (0.57; 1.12)               |
| Gestodene 20         | 94,767       | 42                 | 1.43 (1.07; 1.88)               |                  |                                 | 14                                               | 0.54 (0.29; 0.91)               |
| Gestodene 30         | 56,226       | 26                 | 1.48 (1.02; 2.08)               |                  |                                 | 16                                               | 1.01 (0.57; 1.64)               |

Model adjusted for age, CMUc (free access to health care for people with an annual income <50% of the poverty threshold), medical risk factors, gynaecological visit during the previous year, type of progestogen (for the dose of EE), dose of EE (for the type of progestogen).

Supplementary Table 13 Adjusted relative risks of pulmonary embolism, ischaemic stroke, myocardial infarction according to the type of COC with censoring of exposure one month after the end of the period covered by the last filled prescription (M+1)

|                      | Number of WY | Pulmonary embolism |                                 | Ischaemic Stroke |                                 | Myocardial infarction                            |                                 |
|----------------------|--------------|--------------------|---------------------------------|------------------|---------------------------------|--------------------------------------------------|---------------------------------|
|                      |              | Number of events   | Adjusted relative Risk (95% CI) | Number of events | Adjusted relative Risk (95% CI) | Number of events                                 | Adjusted relative Risk (95% CI) |
| EE dose 20µg         | 1,067,982    | 358                | 0.76 ( 0.67; 0.87)              | 140              | 0.80 ( 0.65; 0.99)              | 33                                               | 0.56 ( 0.32; 0.93)              |
| EE dose 30-40µg      | 2,827,526    | 981                | 1                               | 574              | 1                               | 237                                              | 1                               |
| Levonorgestrel       | 2,738,238    | 787                | 1                               | 546              | 1                               | 223                                              | 1                               |
| Desogestrel          | 930,647      | 455                | 2.16 ( 1.90; 2.45)              | 132              | 0.97 ( 0.78; 1.19)              | 41                                               | 1.02 ( 0.62; 1.61)              |
| Gestodene            | 226,622      | 97                 | 1.69 ( 1.36; 2.10)              | 36               | 0.83 ( 0.58; 1.16)              | 6                                                | 0.45 ( 0.13; 1.13)              |
| <b>Type of COC</b>   |              |                    |                                 |                  |                                 | <b>Ischaemic Stroke or Myocardial infarction</b> |                                 |
| Norethisterone 35    | 66,714       | 13                 | 0.52 ( 0.30; 0.83)              |                  |                                 | 22                                               | 0.71 ( 0.45; 1.05)              |
| Levonorgestrel 20    | 426,609      | 82                 | 0.79 ( 0.64; 0.98)              |                  |                                 | 46                                               | 0.56 ( 0.41; 0.75)              |
| Levonorgestrel 30/40 | 2,311,628    | 705                | 1                               |                  |                                 | 723                                              | 1                               |
| Norgestrel 50        | 32,770       | 20                 | 1.73 ( 1.12; 2.54)              |                  |                                 | 36                                               | 2.66 ( 1.88; 3.64)              |
| Desogestrel 20       | 499,495      | 214                | 1.58 ( 1.37; 1.82)              |                  |                                 | 106                                              | 0.86 ( 0.69; 1.05)              |
| Desogestrel 30       | 431,152      | 241                | 2.28 ( 1.98; 2.61)              |                  |                                 | 67                                               | 0.77 ( 0.60; 0.98)              |
| Gestodene 20         | 141,877      | 62                 | 1.49 ( 1.16; 1.88)              |                  |                                 | 21                                               | 0.52 ( 0.33; 0.78)              |
| Gestodene 30         | 84,745       | 35                 | 1.39 ( 1.00; 1.88)              |                  |                                 | 21                                               | 0.84 ( 0.53; 1.26)              |

Model adjusted for age, CMUc (free access to health care for people with an annual income <50% of the poverty threshold), medical risk factors, gynaecological visit during the previous year, type of progestogen (for the dose of EE), dose of EE (for the type of progestogen)

Supplementary Table 14: Adjusted relative risks of pulmonary embolism, ischaemic stroke, myocardial infarction and composite event for non-switcher patients according to type of COC

|                 | Number of WY | Pulmonary embolism |                                 | Ischaemic Stroke |                                 | Myocardial infarction |                                 | Composite event  |                                 |
|-----------------|--------------|--------------------|---------------------------------|------------------|---------------------------------|-----------------------|---------------------------------|------------------|---------------------------------|
|                 |              | Number of events   | Adjusted relative Risk (95% CI) | Number of events | Adjusted relative Risk (95% CI) | Number of events      | Adjusted relative Risk (95% CI) | Number of events | Adjusted relative Risk (95% CI) |
| EE dose 20µg    | 1,081,717    | 382                | 0.77 (0.68; 0.88)               | 155              | 0.80 (0.67; 0.95)               | 42                    | 0.64 (0.44; 0.94)               | 579              | 0.76 (0.68; 0.85)               |
| EE dose 30-40µg | 3,442,349    | 1,203              | 1                               | 766              | 1                               | 327                   | 1                               | 2,296            | 1                               |
| Levonorgestrel  | 3,313,297    | 994                | 1                               | 724              | 1                               | 310                   | 1                               | 2,028            | 1                               |
| Desogestrel     | 1,007,165    | 500                | 2.13 (1.89; 2.41)               | 155              | 0.99 (0.83; 1.17)               | 52                    | 1.03 (0.72; 1.44)               | 707              | 1.59 (1.44; 1.76)               |
| Gestodene       | 203,604      | 91                 | 1.68 (1.34; 2.08)               | 42               | 1.01 (0.76; 1.33)               | 7                     | 0.51 (0.21; 1.02)               | 140              | 1.28 (1.06; 1.54)               |

Model adjusted for age, CMUc (free access to health care for people with an annual income <50% of the poverty threshold), medical risk factors, gynaecological visit during the previous year, type of progestogen (for the dose of EE), dose of EE (for the type of progestogen)
